# Supplementary material
Source: PubMed Central journal article supplement (PMC2638506)

S1

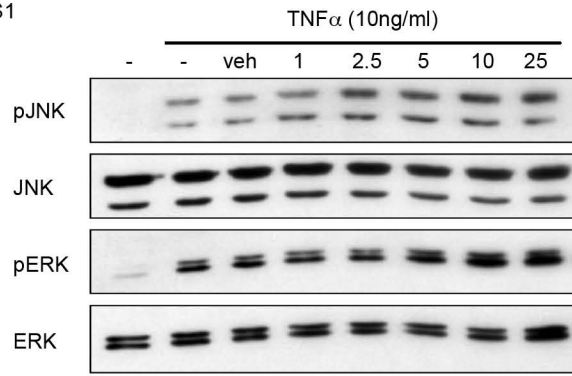

Supplement: NIHMS88997-supplement-1.pdf [file NIHMS88997-supplement-1.pdf]

S2

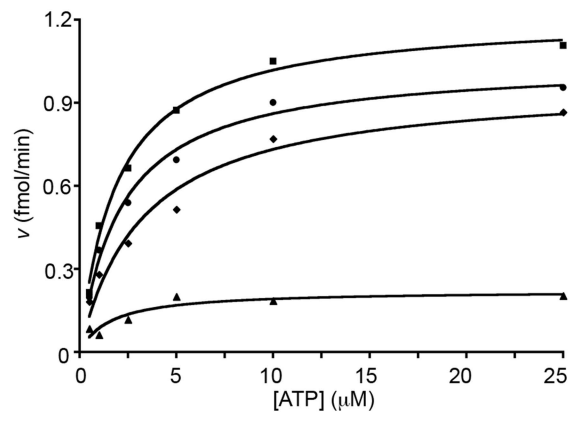

Supplement: NIHMS88997-supplement-2.pdf [file NIHMS88997-supplement-2.pdf]
